# Supplementary material for: Detection and Molecular Characterization of Giardia and Cryptosporidium spp. Circulating in Wild Small Mammals from Portugal
Source: MDPI journal article supplement (doi:10.3390/ani13030515), 2023-02-01
Supplement: s1 [file s1]

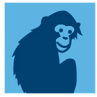**Table S1.** Oligonucleotides used for the molecular identification and/or characterization of *Cryptosporidium* spp. and *Giardia* spp. in the present study.

| Target organism             | Locus      | Oligonucleotides | Sequence (5' → 3')                                                                                 | Reference |
|-----------------------------|------------|------------------|----------------------------------------------------------------------------------------------------|-----------|
| <i>Cryptosporidium</i> spp. | SSU rRNA   | CR-P1            | CAGGGAGGTAGTGACAAGAA                                                                               | [55]      |
|                             |            | CR-P2            | TCAGCCTTGCGACCATACTC                                                                               |           |
|                             |            | CR-P3            | ATTGGAGGGCAAGTCTGGTG                                                                               |           |
|                             |            | CPB-DIAGR        | TAAGGTGCTGAAGGAGTAAGG                                                                              |           |
| <i>Giardia</i> spp.         | SSU rRNA   | Probe            | FAM-CCCGCGGCGGTCCCTGCTAG-BHQ1                                                                      | [51]      |
|                             |            | Gd-80F           | GACGGCTCAGGACAACGGTT                                                                               |           |
|                             |            | Gd-127R          | TTGCCAGCGGTGTCCG                                                                                   |           |
|                             | SSU rRNA   | RH11-derivates   | Equal mix of CATCCGGTCGATCCTGCC and CATCCGGTTGATCCTGCC                                             | [17]      |
|                             |            | Gia2150c         | CTGCTGCCGTCCTTGGATGT                                                                               |           |
|                             | SSU rRNA   | RH-4 derivates   | Equal mix of AGTCGAACCCTGATTCTCCGCCAGG and AGTCAAACCCTGATCCTCCGCCAGG and AGTCGAACCCTGATTCTCCGTCAGG |           |
|                             |            |                  |                                                                                                    |           |
|                             | <i>gdh</i> | GDHeF            | TCAACGTYAAYCGYGGYTTCGGT                                                                            | [53]      |
|                             |            | GDHiR            | GTTRTCCTTGCACATCTCC                                                                                |           |
|                             |            | GDHiF            | CAGTACAACTCYGCTCTCGG                                                                               |           |
|                             | <i>bg</i>  | G7               | AAGCCCGACGACCT CACCCGCAGTGC                                                                        | [54]      |
|                             |            | G759             | AGGCCGCCCTGGATCTTCGAGACGAC                                                                         |           |
|                             |            | G99              | GAACGAACGAGATCGAGGTCCG                                                                             |           |
|                             |            | G609             | CTCGACGAGCTTCGTGTT                                                                                 |           |

*bg* – beta-giardin; *gdh* – glutamate dehydrogenase; *SSU* – small subunit
